# Supplementary material for: Heterolytic alkene oxidation with H2O2 catalyzed by Nb-substituted Lindqvist tungstates immobilized on carbon nanotubes
Source: Royal Society of Chemistry journal article supplement (doi:10.1039/d1cy00153a), 2021-01-01
Supplement: d1cy00153a1.pdf [file d1cy00153a1.pdf]

## Supplementary Information

### Heterolytic alkene oxidation with H<sub>2</sub>O<sub>2</sub> catalyzed by Nb-substituted Lindqvist tungstate immobilized on carbon nanotubes

Vasiliy Yu. Evtushok,<sup>a</sup> Irina D. Ivanchikova,<sup>a</sup> Vladimir A. Lopatkin,<sup>a,b</sup>

Nataliya V. Maksimchuk,<sup>a</sup> Olga Yu. Podyacheva,<sup>a</sup> Arina N. Suboch,<sup>a</sup> Olga A. Stonkus<sup>a</sup>  
and Oxana A. Kholdeeva\*<sup>a</sup>

<sup>a</sup> Boreskov Institute of Catalysis, Pr. Lavrentieva 5, Novosibirsk 630090, Russia

<sup>b</sup> Novosibirsk State University, Pirogova str. 2, Novosibirsk 630090, Russia

\* Corresponding author: [khold@catalysis.ru](mailto:khold@catalysis.ru)

## Table of Contents

|                                                                                                                                                                                                                                                                                                                                    |      |
|------------------------------------------------------------------------------------------------------------------------------------------------------------------------------------------------------------------------------------------------------------------------------------------------------------------------------------|------|
| <b>Tables</b>                                                                                                                                                                                                                                                                                                                      |      |
| <b>Table S1.</b> Textural and elemental analysis data for CNTs and N-CNTs supports and representative supported $\text{HNb}(\text{O}_2)\text{W}_5$ catalysts                                                                                                                                                                       | p. 2 |
| <b>Figures</b>                                                                                                                                                                                                                                                                                                                     |      |
| <b>Fig. S1.</b> FT-IR spectra of $(\text{Bu}_4\text{N})_3[\text{Nb}(\text{O})\text{W}_5\text{O}_{18}]$ , $(\text{Bu}_4\text{N})_2[(\text{CH}_3\text{O})\text{NbW}_5\text{O}_{18}]$ , $(\text{Bu}_4\text{N})_4[(\text{NbW}_5\text{O}_{18})_2\text{O}]$ and $(\text{Bu}_4\text{N})_2[\text{HNb}(\text{O}_2)\text{W}_5\text{O}_{18}]$ | p. 2 |
| <b>Fig. S2.</b> Effect of $\text{HClO}_4$ on adsorption of $\text{HNb}(\text{O}_2)\text{W}_5$ on N-CNTs (MeCN, 25 °C).                                                                                                                                                                                                             | p. 3 |
| <b>Fig. S3.</b> HAADF-STEM images (a-b) and EDX spectrum (c) of 15 wt% $\text{HNb}(\text{O}_2)\text{W}_5/\text{CNTs}$                                                                                                                                                                                                              | p. 4 |
| <b>Fig. S4.</b> EDX spectrum of 15 wt% $\text{HNb}(\text{O}_2)\text{W}_5/\text{CNTs}$ .                                                                                                                                                                                                                                            | p. 5 |

**Table S1.** Elemental analysis and textural data for CNTs and N-CNTs supports and representative supported  $\text{HNb}(\text{O}_2)\text{W}_5$  catalysts

| Catalyst/Support                                 | N<br>(at%) | POM<br>(wt%) | $S_{\text{BET}}$<br>( $\text{m}^2/\text{g}$ ) | $V_{\text{pore}}$<br>( $\text{cm}^3/\text{g}$ ) |
|--------------------------------------------------|------------|--------------|-----------------------------------------------|-------------------------------------------------|
| CNTs                                             | 0          | -            | 150                                           | 0.70                                            |
| N-CNTs                                           | 0.9        | -            | 161                                           | 0.64                                            |
| N-CNTs                                           | 4.8        | -            | 157                                           | 0.53                                            |
| $\text{HNb}(\text{O}_2)\text{W}_5/\text{CNTs}$   | 0          | 15           | 118                                           | 0.33                                            |
| $\text{HNb}(\text{O}_2)\text{W}_5/\text{N-CNTs}$ | 0.9        | 15           | 124                                           | 0.39                                            |

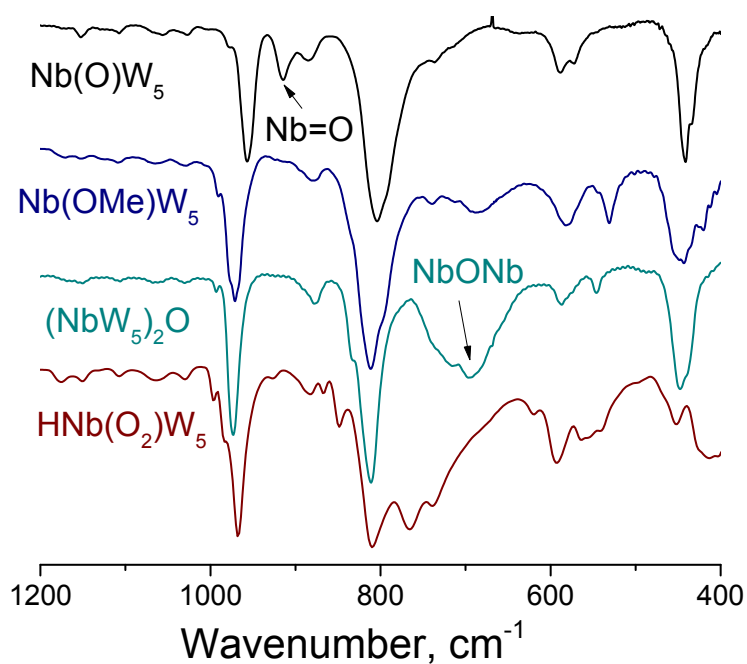

**Fig. S1.** FT-IR spectra of  $(\text{Bu}_4\text{N})_3[\text{Nb}(\text{O})\text{W}_5\text{O}_{18}]$  ( $\text{Nb}(\text{O})\text{W}_5$ ),  $(\text{Bu}_4\text{N})_2[(\text{CH}_3\text{O})\text{NbW}_5\text{O}_{18}]$  ( $\text{Nb}(\text{OCH}_3)\text{W}_5$ ),  $(\text{Bu}_4\text{N})_4[(\text{NbW}_5\text{O}_{18})_2\text{O}]$  ( $(\text{NbW}_5)_2\text{O}$ ), and  $(\text{Bu}_4\text{N})_2[\text{HNb}(\text{O}_2)\text{W}_5\text{O}_{18}]$  ( $\text{HNb}(\text{O})_2\text{W}_5$ ).

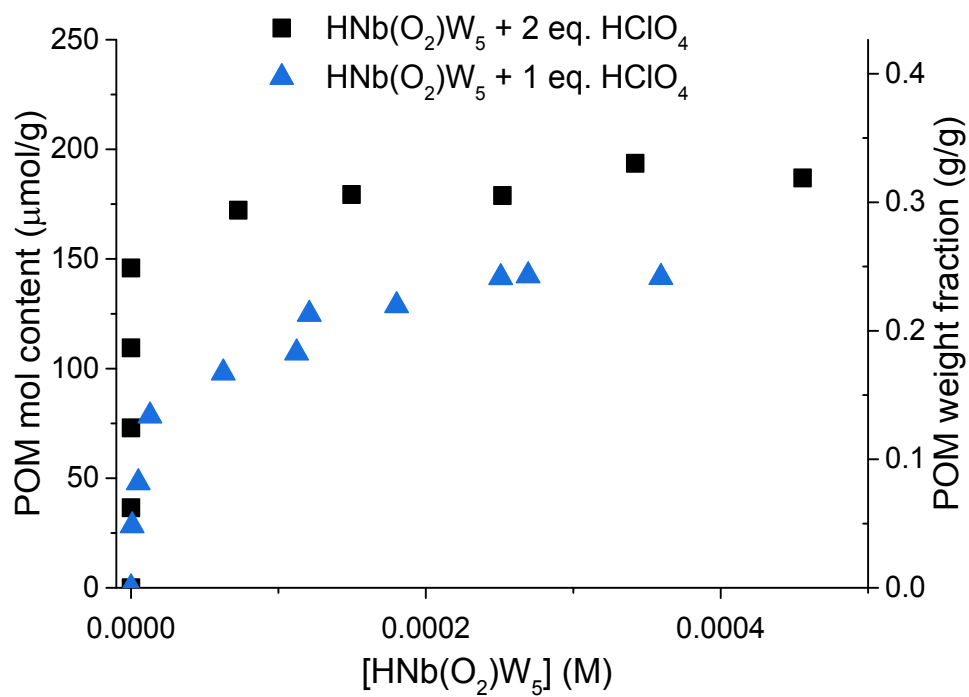

**Fig. S2.** Effect of HClO<sub>4</sub> on adsorption of HNb(O<sub>2</sub>)W<sub>5</sub> on N-CNTs (MeCN, 25 °C).

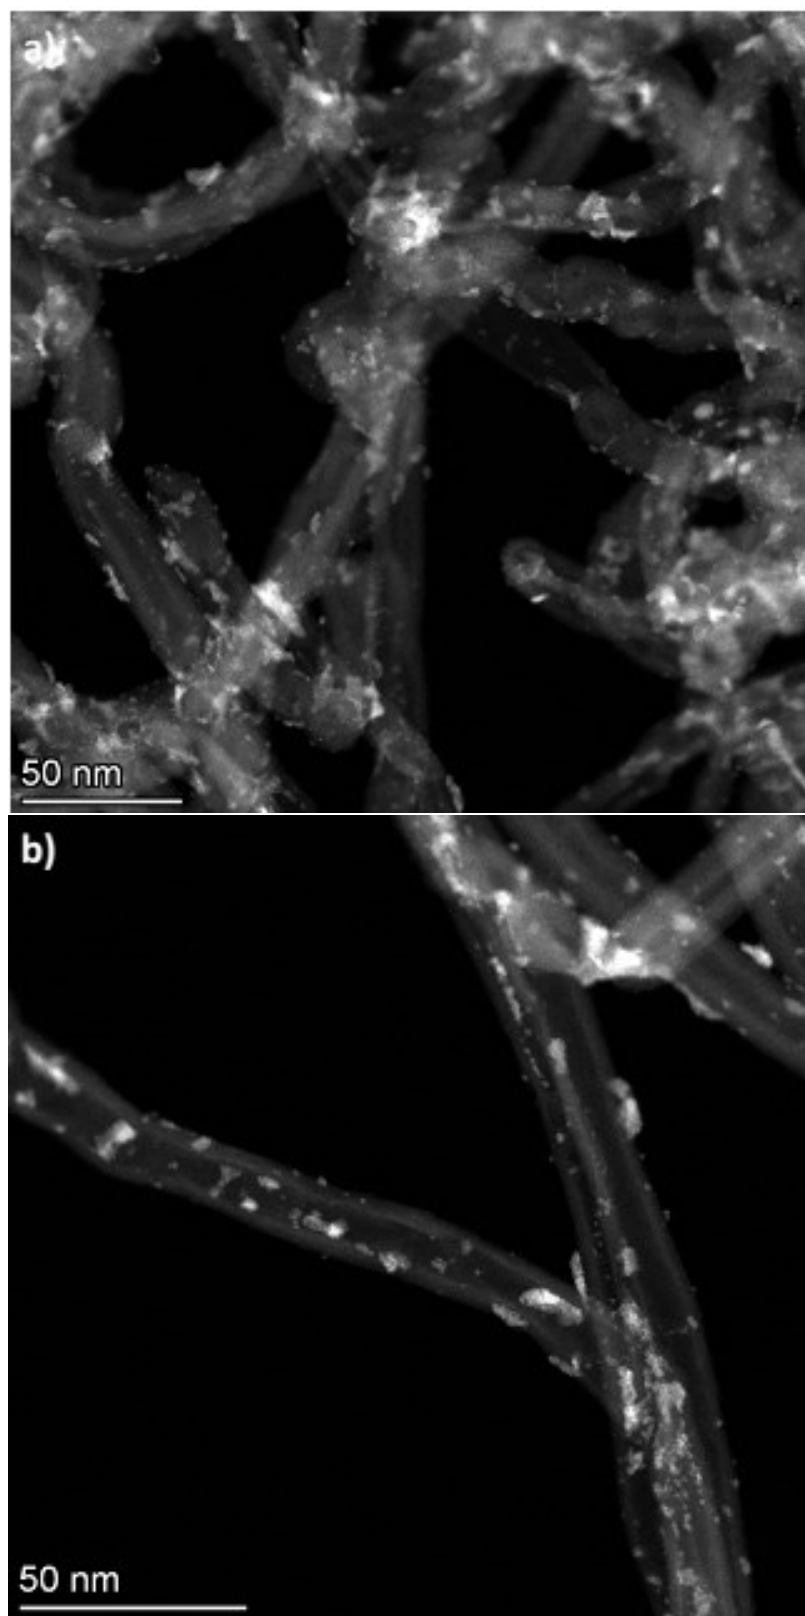

**Fig. S3.** HAADF-STEM images of 15 wt% HNb(O<sub>2</sub>)W<sub>5</sub>/CNTs.

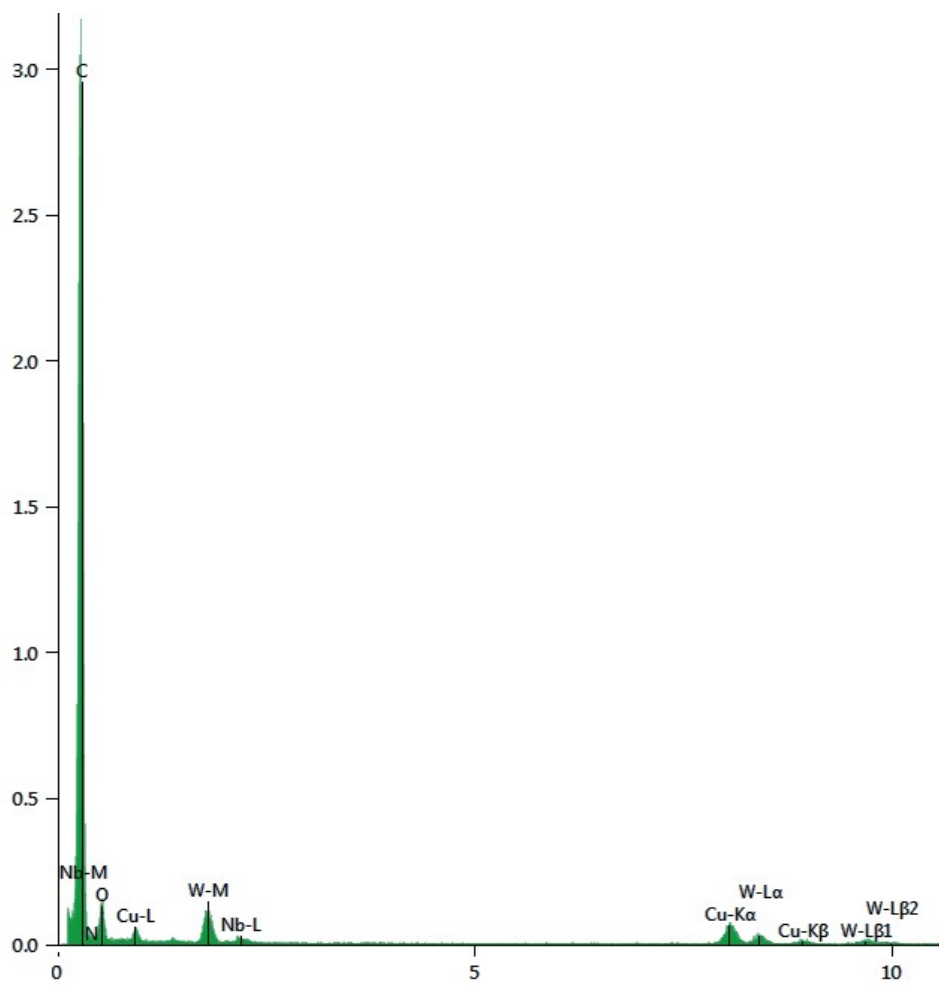

**Fig. S4.** EDX spectrum of 15 wt% HNb(O<sub>2</sub>)W<sub>5</sub>/CNTs.
